# Supplementary material
Source: PubMed Central journal article supplement (PMC9372902)
Supplement: jama-e2212283-s001.pdf [file jama-e2212283-s001.pdf]

## Supplemental Online Content

Meeks LM, Pereira-Lima K, Plegue M, et al. Assessment of accommodation requests reported by a national sample of US MD students by category of disability. *JAMA*. Published online August 11, 2022. doi:10.1001/jama.2022.12283

**eMethods.** 2019 and 2020 Association of American Medical Colleges Year-Two Questionnaire survey questions used in the present study

This supplemental material has been provided by the authors to give readers additional information about their work.

**eMethods.** 2019 and 2020 Association of American Medical Colleges Year-Two Questionnaire survey questions used in the present study

**Demographic questions**

Question 1: Sex

What sex were you assigned at birth?

- Male
- Female

Question 2: Age

Age during second year:

- Under 21
- 21 through 23
- 24 through 26
- 27 through 29
- Over 29

Question 3: Sexual orientation

How do you self-identify?

- Bisexual
- Gay or lesbian
- Heterosexual or straight

Question 4: Race/ethnicity

How do you self-identify

- American Indian or Alaska Native
- Asian
- Black or African American
- Hispanic, Latino, or of Spanish origin
- Native Hawaiian or Other Pacific Islander
- White
- Other
- Non-U.S. citizen and Non-permanent resident

**Disability-related questions**

Question 1: Self-reported disability

Are you a person with a disability (e.g., ADHD, learning, psychological, chronic health, mobility, hearing, vision, etc.)?

- Yes
- No
- I do not know

Question 2: Type of disability

Which of the following best describes your disability? If you have more than one type, select all that apply.

- Attention deficit/hyperactivity disorder
- Chronic health disability
- Deaf or hard of hearing
- Learning disability
- Mobility disability
- Psychological disability
- Visual disability
- Other [option to insert an open-text response]

Question 3: Medical school accommodations for disability

Has your medical school provided accommodations for your disability?

- Yes
- No

Question 4: Reason why no accommodations were made

Which of the following best describes why your medical school did not or has not provided accommodations:

- My request for accommodations was denied
- My request for accommodations is under review
- I have not requested accommodations because I feel I do not need accommodations
- I have not requested accommodations for other reasons
